# Supplementary material for: Holey cobalt oxyhydroxide nanosheets for the oxygen evolution reaction
Source: Royal Society of Chemistry journal article supplement (doi:10.1039/d0ta10429a), 2021-01-01
Supplement: d0ta10429a1.pdf [file d0ta10429a1.pdf]

## Electronic Supplementary Information

### Holey cobalt oxyhydroxides nanosheets towards oxygen evolution reaction†

Qing-Ling Hong,<sup>a</sup> Quan-Guo Zhai,<sup>a</sup> Xiao-Li liang,<sup>b</sup> Yun Yang,<sup>b,\*</sup> Fu-Ming Li,<sup>c</sup> Yu-Cheng Jiang,<sup>a</sup> Man-Cheng Hu,<sup>a</sup> Shu-Ni Li,<sup>a,\*</sup> and Yu Chen,<sup>c</sup>

<sup>a</sup> Key Laboratory of Macromolecular Science of Shaanxi Province, School of Chemistry and Chemical Engineering, Shaanxi Normal University, Xi'an 710062, PR China. E-mail: [lishuni@snnu.edu.cn](mailto:lishuni@snnu.edu.cn) (S. Li)

<sup>b</sup> Nanomaterials and Chemistry Key Laboratory, Wenzhou University, Wenzhou, China. E-mail: [bachier@163.com](mailto:bachier@163.com) (Y. Yang)

<sup>c</sup> School of Materials Science and Engineering, Shaanxi Normal University, Xi'an 710062.

† Electronic Supplementary Information (ESI) available: Experimental details and additional physical characterization. See DOI: 10.1039/x0xx00000x

## Experimental section

**Reagents and chemicals.** Ethylenediamine tetraacetic acid disodium salt ( $\text{Na}_2\text{EDTA}$ ), hydrogen peroxide ( $\text{H}_2\text{O}_2$ , 30%), and cobalt (II) chloride hexahydrate ( $\text{CoCl}_2 \cdot 6\text{H}_2\text{O}$ ) was purchased from Sinopharm Chemical Reagent Co., Ltd. (China). Sodium hydroxide ( $\text{NaOH}$ , 97%) and potassium hydroxide ( $\text{KOH}$ , 85%) were provided by Alfa Aesar (China). Commercial  $\text{RuO}_2$  nanoparticles ( $\text{RuO}_2$  CNPs) were obtained from Aladdin Industrial Corporation.

**Synthesis of  $\text{CoOOH}$  HNSs.**  $\text{CoOOH}$  HNSs were synthesized by a simple coordination-oxidation-hydrolysis method. In a typical procedure, 20 mL aqueous solution of the mixture  $\text{CoCl}_2$  (0.2 mmol) and  $\text{Na}_2\text{EDTA}$  (0.2 mmol) were stirred for 10 min at room temperature. Then  $\text{NaOH}$  solution (5 M) was added into the above solution until pH 13. The color of the solution changed from pink to purple. Next,  $\text{H}_2\text{O}_2$  (30  $\mu\text{L}$  30%) was added dropwise and the color of the solution becomes blue. After continually stirring for 10 hours at room temperature, the dark brown precipitate can be clearly seen with the vanish of the blue color of the solution. The precipitates were collected by centrifugation and washed with water until pH 7. Finally, it was dried in a vacuum at 60  $^\circ\text{C}$ . For comparison,  $\text{CoOOH}$  INPs were synthesized without  $\text{Na}_2\text{EDTA}$ .

**Synthesis of  $\text{CoOOH}$  INPs.** In a typical procedure, 30  $\mu\text{L}$   $\text{H}_2\text{O}_2$  was added into 20 mL  $\text{CoCl}_2$  (0.2 mmol) aqueous solution. Then pH of the solution was adjusted to 13 by  $\text{NaOH}$ . After continually stirring for 1 hour at room temperature, the precipitates were collected by centrifugation and washed with water until pH 7. Finally, it was dried in a vacuum at 60  $^\circ\text{C}$ .

In the preparation process of  $\text{CoOOH}$  INPs,  $\text{Co}(\text{OH})_2$  can be oxidized immediately to  $\text{CoOOH}$  in the presence of  $\text{H}_2\text{O}_2$ , which is similar to the preparation mechanism of  $\text{CoOOH}$  HNSs.

**Physical characterization.** The morphology and composition of the samples were characterized by SU-8020 scanning electron microscopy (SEM) equipped with energy

dispersive X-ray spectroscopy (EDX). Transmission electron microscope (TEM) and selected area electron diffraction (SAED) were tested with TECNAI G2 F20 instrument. Powder X-ray diffraction (XRD) pattern was obtained by DX-2700 power X-ray diffractometer using silicon wafer as measuring substrate. X-ray photoelectron spectroscopy (XPS) was conducted on AXIS ULTRA spectrometer. The binding energies achieved in the XPS spectral analysis were corrected for specimen charging by referencing C 1s to 284.5 eV. The atomic force microscope (AFM) was performed on the Dimension Icon instrument. The ASAP 2460 surface area and porosimetry analyzer were used to analyze the specific surface area and pore size distribution of samples. UV-2600 ultraviolet-visible (UV-vis) was used to monitor the interaction between Na<sub>2</sub>EDTA and CoCl<sub>2</sub> under different conditions.

**Electrochemical measurements.** Electrochemical impedance spectroscopy (EIS), linear sweep voltammetry (LSV), cyclic voltammetry (CV), and chronopotentiometry tests were used on a CHI 660E electrochemical analyzer in 1 M KOH electrolyte saturated with O<sub>2</sub>, using a three-electrode system at room temperature. The electrocatalyst modified glassy carbon electrode was used as the working electrode and carbon rod was used as the auxiliary electrode. It should be noted that the saturated calomel electrode (SCE) protected by Luggin capillary with KCl solutions was served as reference electrode. All LSV curves in the electrochemical test were compensated for 95%  $iR$ . All potentials mentioned in the article correspond to the reversible hydrogen electrode potential (RHE), where  $E_{\text{RHE}} = E_{\text{SCE}} + 0.242 \text{ V} + 0.0591 \text{ pH}$ . The saturated calomel electrode (SCE) is used as the reference electrode, the carbon rod is used as the auxiliary electrode, and the electrocatalyst modified glassy carbon electrode as the working electrode.

**Preparation of working electrode.** Under strong ultrasonic vibration, 2 mg of catalyst was dispersed into a solution of 800  $\mu\text{L}$  of water, 5  $\mu\text{L}$  of 5 wt% Nafion and 200  $\mu\text{L}$  of isopropyl alcohol. Then 4  $\mu\text{L}$  of the mixed solution was dropped on the surface of the glassy carbon electrode and dried at room temperature for the electrochemical test.

**Figure**

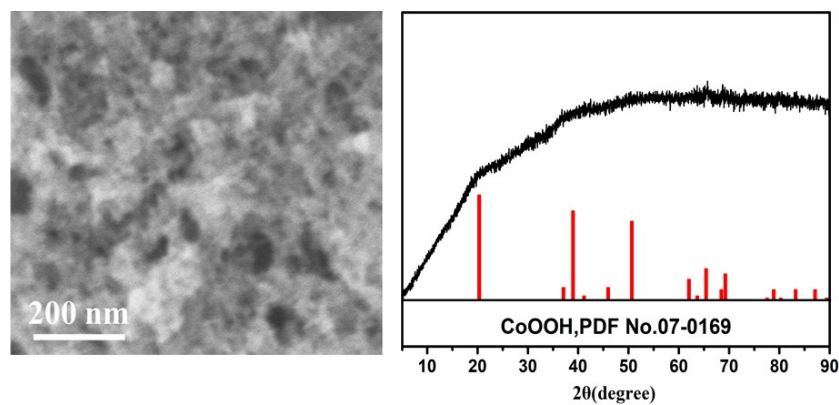

**Fig. S1** SEM and XRD of CoOOH INPs

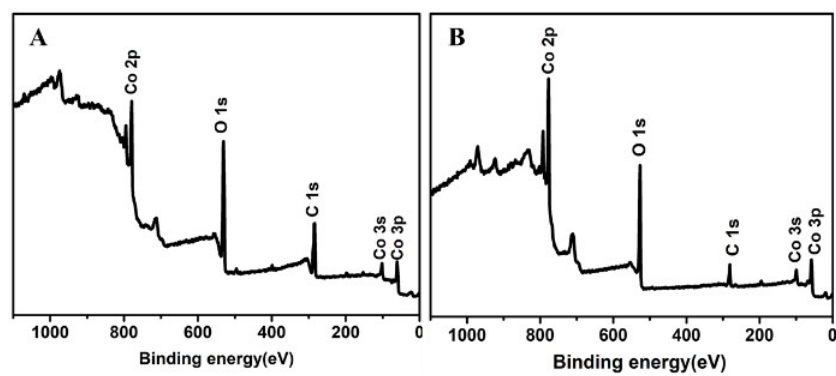

**Fig. S2** XPS survey spectra of (A) CoOOH HNSs and (B) CoOOH INPs.

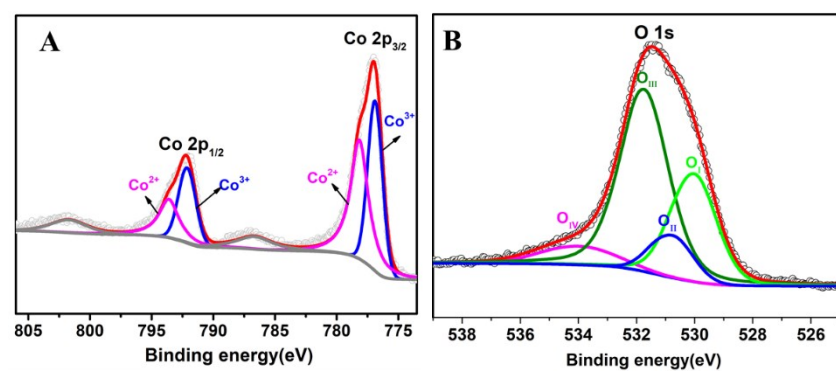

**Fig. S3** (A) Co 2p XPS and (B) O 1s XPS spectra of CoOOH INPs.

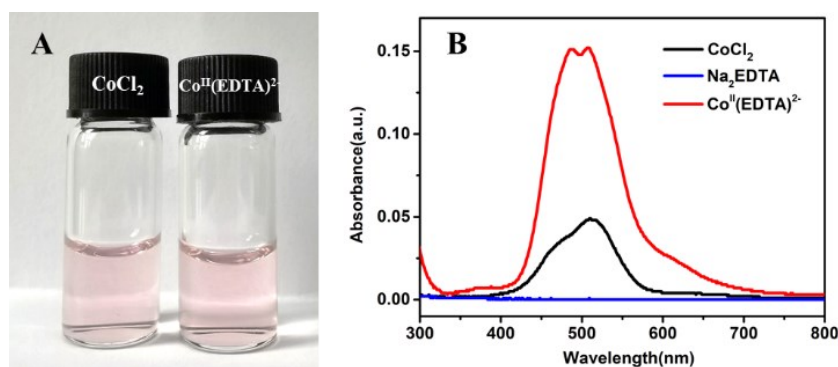

**Fig. S4** (A) The photographs of CoCl<sub>2</sub> and Co<sup>II</sup>(EDTA)<sup>2-</sup> complex aqueous solution at pH=2. (B) UV-Vis spectra of CoCl<sub>2</sub>, Na<sub>2</sub>EDTA, and Co<sup>II</sup>(EDTA)<sup>2-</sup> complex aqueous solution.

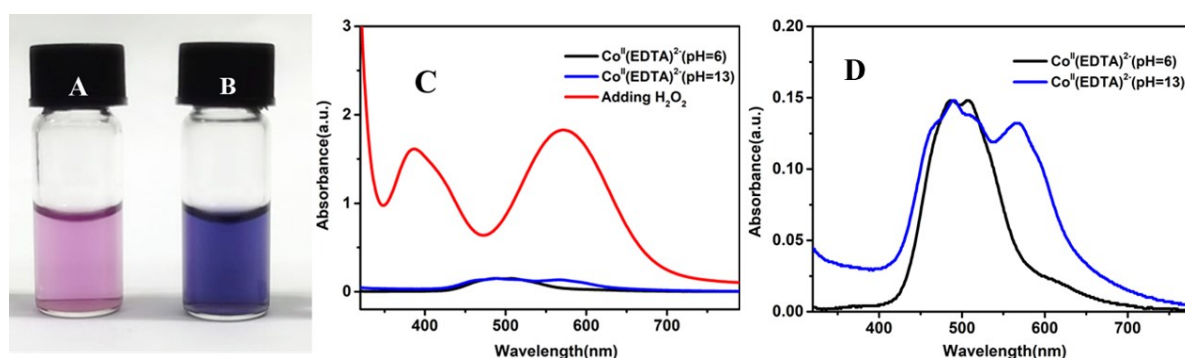

**Fig. S5** The photographs of Co<sup>II</sup>(EDTA)<sup>2-</sup> complex aqueous solution (A) before and (B) after addition of H<sub>2</sub>O<sub>2</sub> at pH=13. (C) UV-Vis spectra of Co<sup>II</sup>(EDTA)<sup>2-</sup> complex aqueous solution before and after adding H<sub>2</sub>O<sub>2</sub> at pH 13. (D) the enlarged picture of (C).

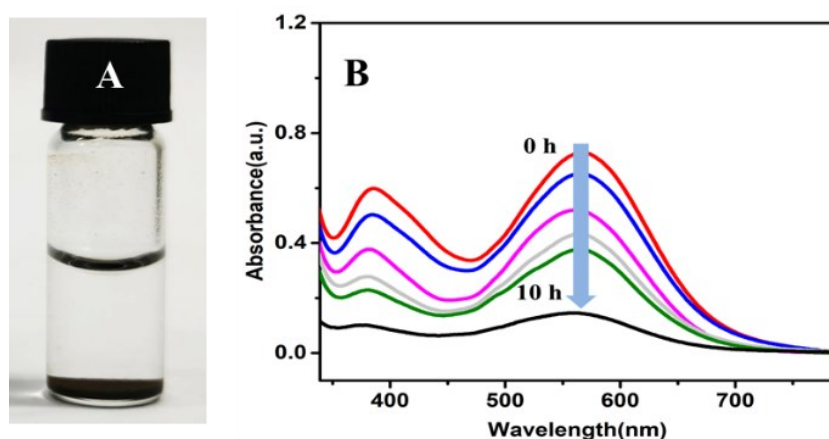

**Fig. S6** (A) The photograph of Co<sup>II</sup>(EDTA)<sup>2-</sup> complex aqueous solution after adding H<sub>2</sub>O<sub>2</sub> for 10 h at pH=13. (B) UV-Vis spectra of Co<sup>II</sup>(EDTA)<sup>2-</sup> complex aqueous solution after adding H<sub>2</sub>O<sub>2</sub>.

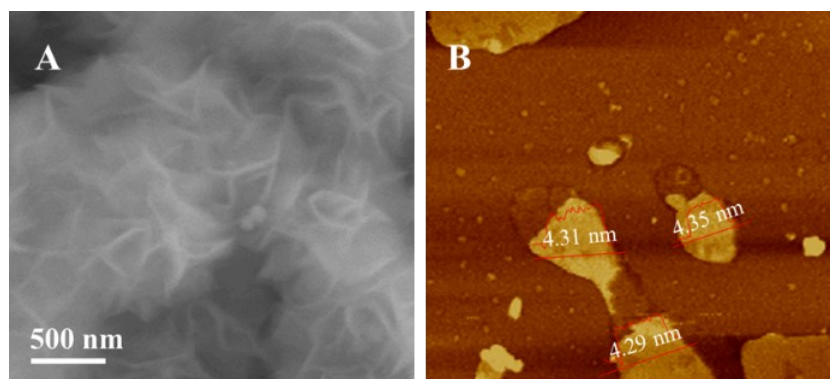

**Fig. S7** (A) SEM image and AFM image of obtained CoOOH HNSs after increasing reaction temperature to 90 °C.

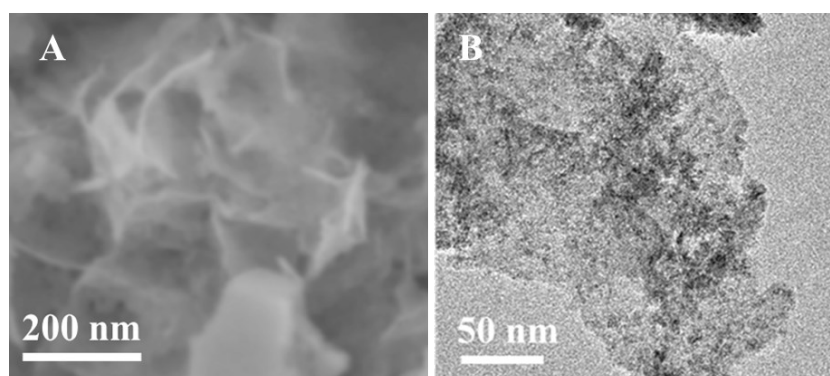

**Fig. S8** (A) SEM and (B) TEM image of CoOOH HNSs after durability test.
